# Supplementary material for: Catalytic activity of nanoalloys from gold and palladium
Source: Royal Society of Chemistry journal article supplement (doi:10.1039/c2cp23974d), 2012-01-01
Supplement: c2cp23974d.pdf [file c2cp23974d.pdf]

# Catalytic Activity of Nanoalloys from Gold and Palladium

*Julian Kaiser, Hannes Welz, Frank Polzer, Stefanie Wunder, Matthias Ballauff\*, Yan Lu\**

<sup>1</sup>F-I2 Soft Matter and Functional Materials, Helmholtz-Zentrum Berlin, Hahn-Meitner-Platz  
1, 14109 Berlin, Germany

*Nelia Wanderka*

<sup>2</sup>F-I1 Institute of Applied Materials, Helmholtz-Zentrum Berlin, Hahn-Meitner-Platz 1, 14109  
Berlin, Germany

*Martin Albrecht*

<sup>3</sup>Leibniz-Institut für Kristallzüchtung, Max-Born-Straße 2, 12489 Berlin

*Thomas Lunkenbein, Josef Brey*

<sup>4</sup>Anorganische Chemie I, Universität Bayreuth, 95440 Bayreuth, Germany

*Linn Leppert, Stephan Kümmel*

<sup>5</sup>Physics Institute, University of Bayreuth, 95440 Bayreuth, Germany

## **Supporting Information**

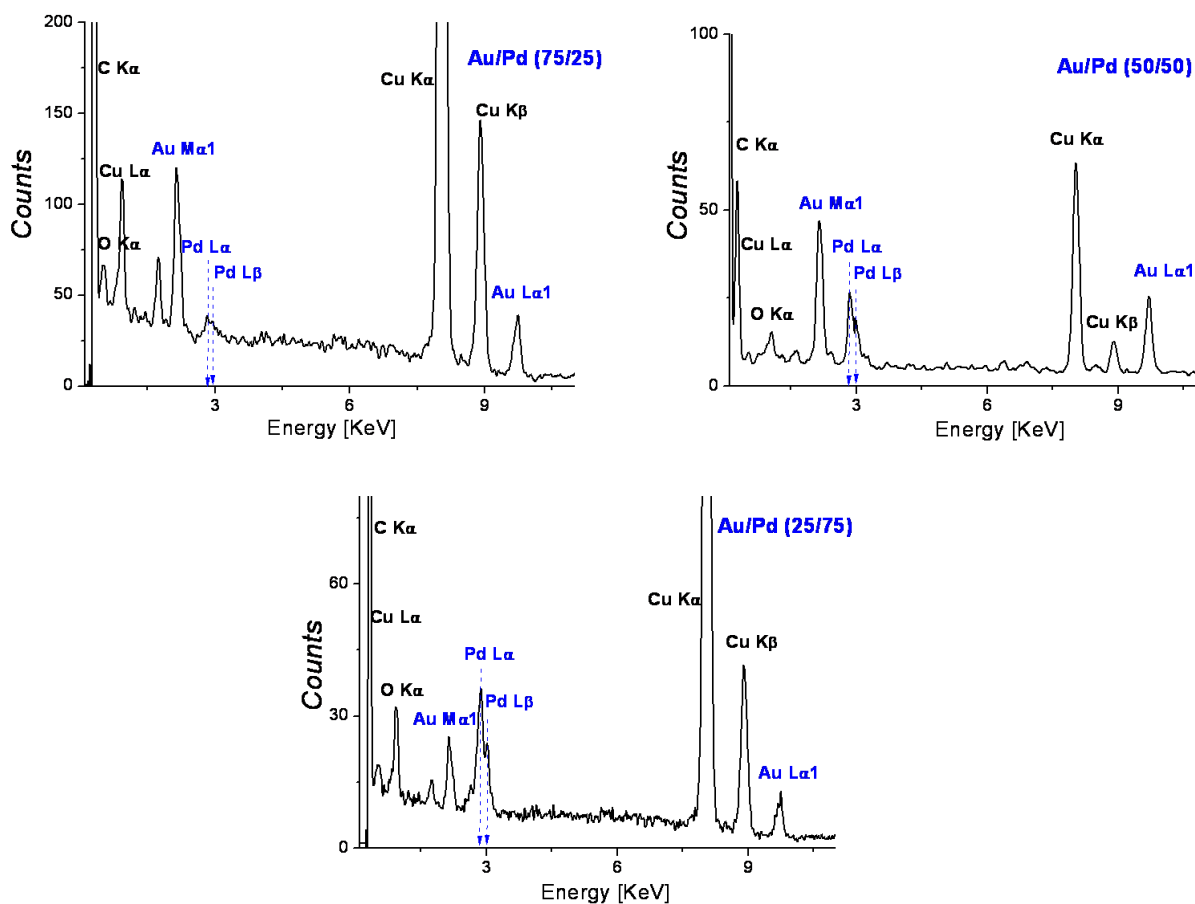

**Figure S1:** EDX spectra of the prepared Au-Pd alloy nanoparticles.

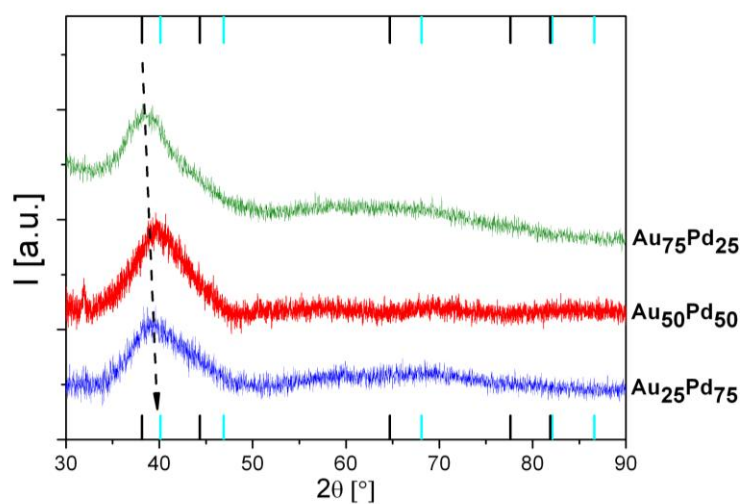

**Figure S2:** PXRD measurements of the prepared Au-Pd alloy nanoparticles. The dashed line indicates the shift of the position of the (111) reflection as a guide for the eye.

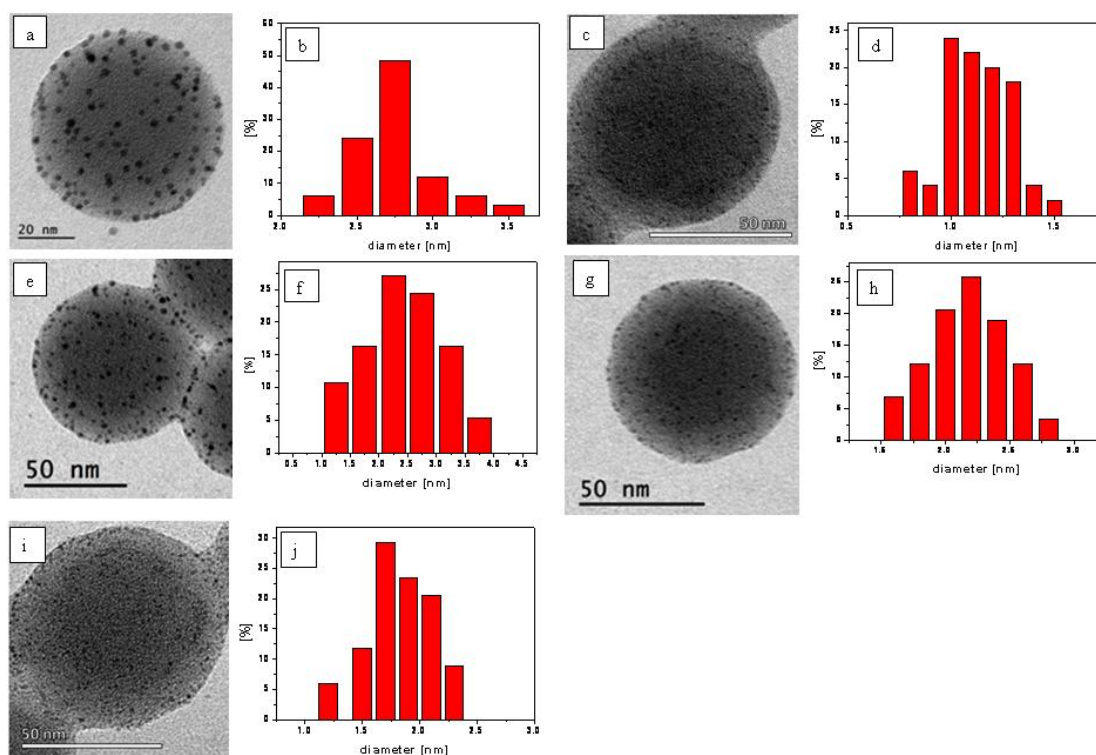

**Figure S3.** TEM images for Au (a), Pd (c), Au<sub>75</sub>Pd<sub>25</sub> (e), Au<sub>50</sub>Pd<sub>50</sub> (g), Au<sub>25</sub>Pd<sub>75</sub> (i) composite particles, and particle size distribution histograms (b, d, f, h, j) of metal nanoparticles evaluated from the corresponding TEM images.

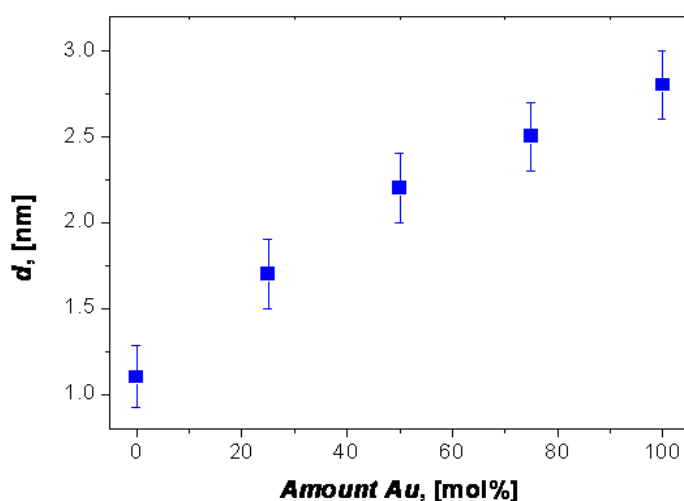

**Figure S4.** Particle size of the Au-Pd nanoparticles with different Au amount obtained by TEM analysis.

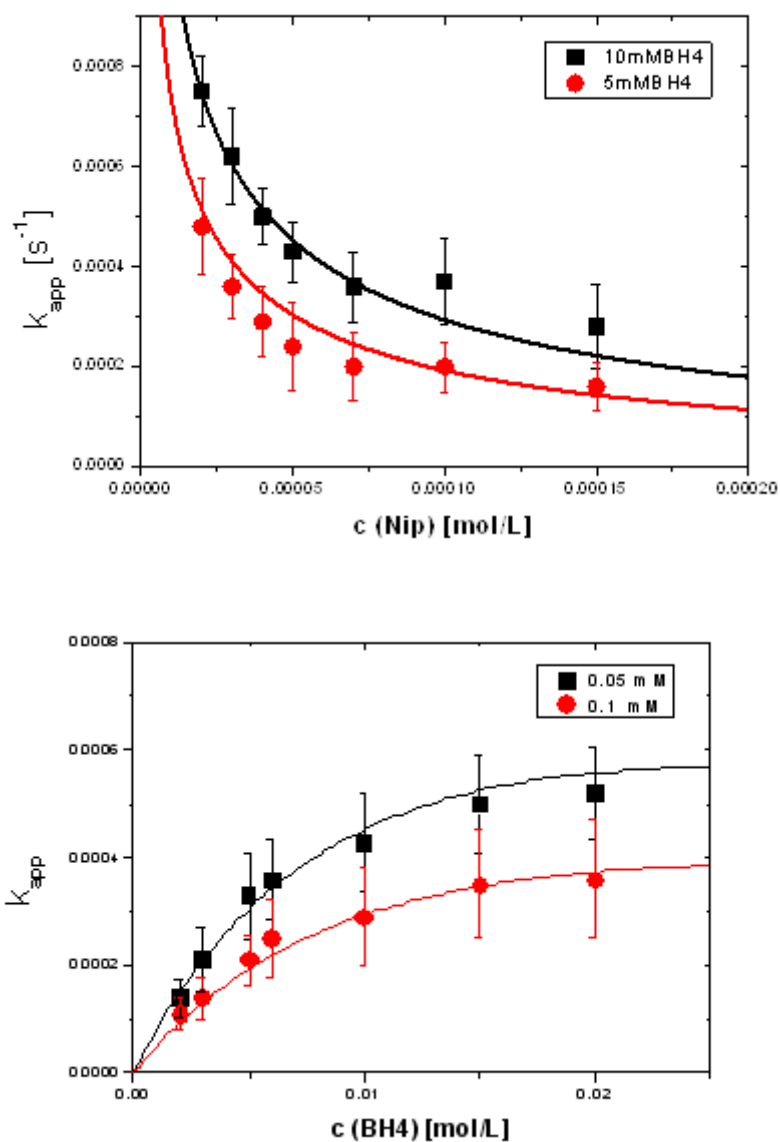

**Figure S5.** Dependence of the apparent rate constant  $k_{app}$  for palladium nanoparticles on the concentration of Nip (upper panel) and BH<sub>4</sub><sup>-</sup> (lower panel), respectively. The solid lines show the fits for the kinetic model.
